# Supplementary material for: Embryonic liver developmental trajectory revealed by single-cell RNA sequencing in the Foxa2eGFP mouse
Source: PubMed Central journal article supplement (PMC7642341; doi:10.1038/s42003-020-01364-8), 2020-11-03
Supplement: 42003_2020_1364_MOESM3_ESM.pdf [file 42003_2020_1364_MOESM3_ESM.pdf]

## Description of Additional Supplementary Files

**File Name: Supplementary Data 1**

**Description:** Statistic information of cells.

**File Name: Supplementary Data 2**

**Description:** Differentially expressed genes (DEGs) between DE-derived gut and VE-derived gut.

**File Name: Supplementary Data 3**

**Description:** Differentially expressed genes (DEGs) between DE-derived gut and PS.

**File Name: Supplementary Data 4**

**Description:** Feature genes list for cell state definition.

**File Name: Supplementary Data 5**

**Description:** Differentially expressed genes (DEGs) between gallbladder primordium and gut tube.

**File Name: Supplementary Data 6**

**Description:** Gene groups of the epithelial-hepatic transition (EHT) dynamic transition.

**File Name: Supplementary Data 7**

**Description:** Differentially expressed genes (DEGs) between liver primordium and gut tube.

**File Name: Supplementary Data 8**

**Description:** Genes list which are identified with RXRA motif.

**File Name: Supplementary Data 9**

**Description:** Dynamic gene expression during hepatoblast development.
